# Supplementary material for: Surface modification of self-assembled isoporous polymer membranes for pressure-dependent high-resolution separation
Source: Royal Society of Chemistry journal article supplement (doi:10.1039/c9py00560a), 2019-01-01
Supplement: c9py00560a1.pdf [file c9py00560a1.pdf]

## Electronic Supplementary Information (ESI)

### Surface Modification of Self-Assembled Isoporous Polymer Membranes for Pressure-Dependent High-Resolution Separation

Yang Ou, Di Zhou, Zhi-Kang Xu, Ling-Shu Wan<sup>\*</sup>

MOE Key Laboratory of Macromolecular Synthesis and Functionalization, Key Laboratory of  
Adsorption and Separation Materials & Technologies of Zhejiang Province, Department of  
Polymer Science and Engineering, Zhejiang University, Hangzhou 310027, China

<sup>\*</sup>Corresponding author. E-mail: lswan@zju.edu.cn; Tel: +86-571-87953763

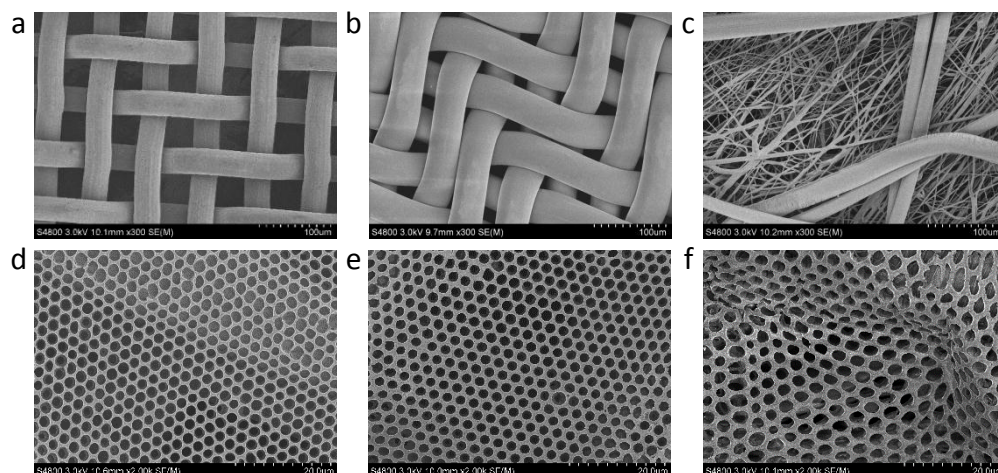

**Fig. S1** SEM images of various porous supports (a-c) and perforated composite membranes prepared by the transfer-free method on these supports (d-f). (a, d) Nylon fabrics (400 mesh); (b, e) stainless steel sieves (300 mesh); (c, f) nonwoven meshes.

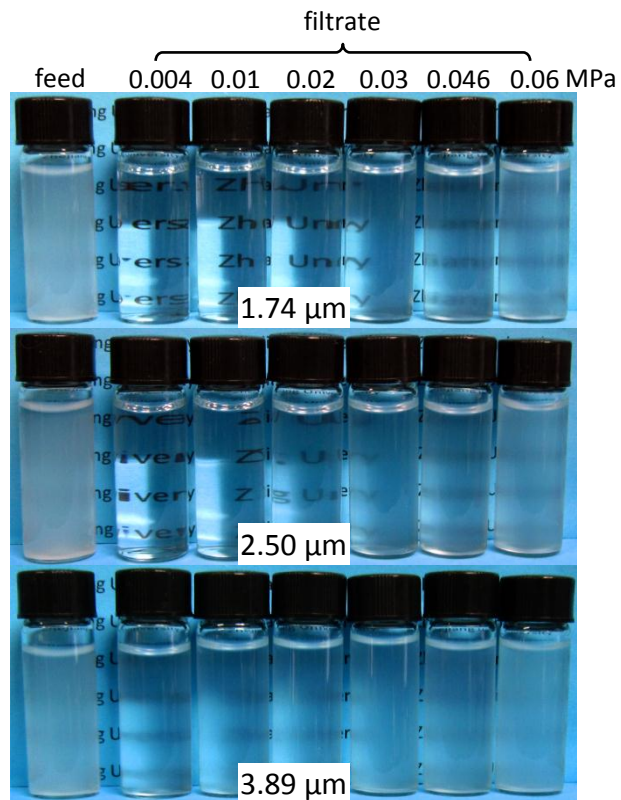

**Fig. S2** Digital photographs of the feed and filtrate yeast solutions through the composite membranes with different pore sizes under various trans-membrane pressures.

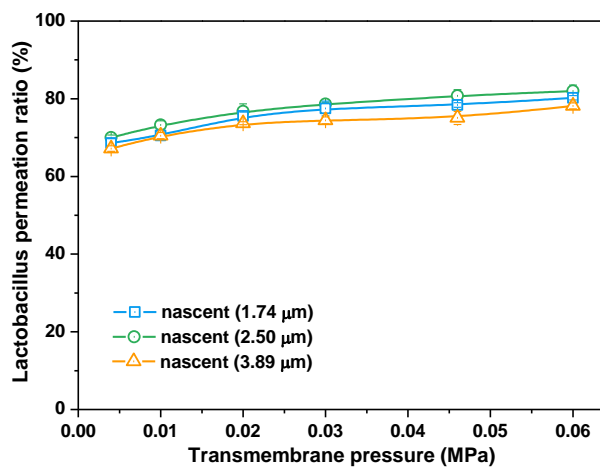

**Fig. S3** Lactobacillus cell permeation ratio through the composite membranes with different pore sizes under various trans-membrane pressures.

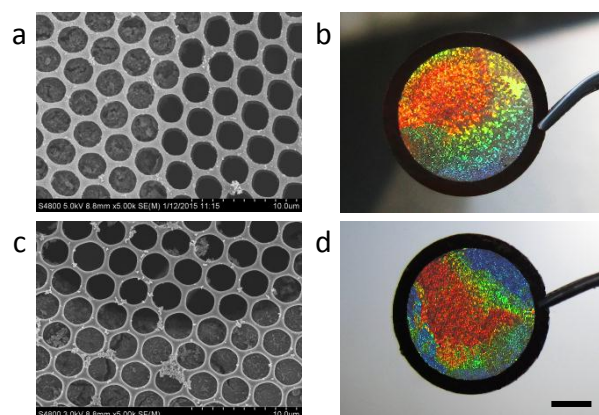

**Fig. S4** SEM and digital images of the composite membranes after PDA/PEI co-deposition (a,b) and PEG modification (c,d). Scale bar in (b) and (d): 3 mm.

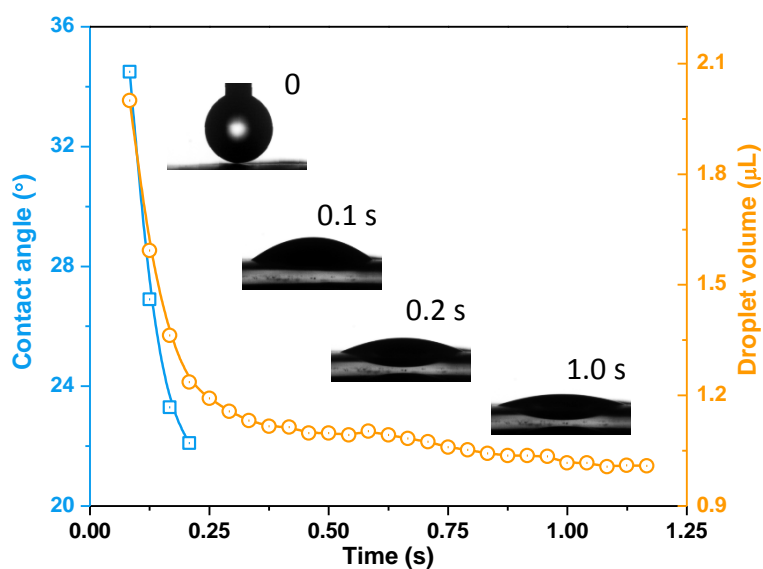

**Fig. S5** (a) Dynamic contact angles of the PEG-modified composite membranes. The insets show optical images of the water permeation process.
